# Supplementary material for: Towards Eradication of PPR: Disease Status, Economic Cost and Perception of Veterinarians in Karnataka, India
Source: MDPI journal article supplement (doi:10.3390/ani13050778), 2023-02-21
Supplement: s1 [file s1]

# Towards Eradication of PPR: Disease Status, Economic Cost and Perception of Veterinarians in Karnataka, India

Gurrappa Naidu Govindaraj <sup>1\*</sup>, Vinayagamurthy Balamurugan <sup>1</sup>, GB Manjunatha Reddy <sup>1</sup>, Revanaiah Yogisharadhy <sup>1</sup>, Timmareddy Sreenivasa Reddy <sup>2</sup>, Gajalavarahalli Subbanna Naveenkumar <sup>1</sup>, Kirubakaran Vinod Kumar <sup>1</sup>, Hosahalli Rajanna Chaithra <sup>1</sup>, Afrin Zainab Bi <sup>1</sup>, Satya Parida <sup>3</sup>, Felix Njeumi <sup>3</sup>, Parimal Roy <sup>1</sup> and Bibek Ranjan Shome <sup>1</sup>

## Supplementary Materials

**Table S1.** Represents different interpolated PPR incidence levels under *vaccination* and *without vaccination scenario* (low (15%), medium (20%) and high (25%)) from 2003-04 to 2025-26 in Karnataka.

| Years   | Incidence under with vaccination scenario (%) (A) | Incidence under without vaccination scenario (%) (B) |              |            | Difference between incidence under with and without vaccination (C = B – A) |              |            |
|---------|---------------------------------------------------|------------------------------------------------------|--------------|------------|-----------------------------------------------------------------------------|--------------|------------|
|         |                                                   | Low (15%)                                            | Medium (20%) | High (25%) | Low (15%)                                                                   | Medium (20%) | High (25%) |
| 2003-04 | 8                                                 | 8                                                    | 8            | 8          | 0                                                                           | 0            | 0          |
| 2004-05 | 8.6                                               | 9                                                    | 9            | 9          | 0.4                                                                         | 0.4          | 0.4        |
| 2005-06 | 9.1                                               | 10                                                   | 10           | 10         | 0.9                                                                         | 0.9          | 0.9        |
| 2006-07 | 9.7                                               | 11                                                   | 11           | 11         | 1.3                                                                         | 1.3          | 1.3        |
| 2007-08 | 10.3                                              | 12                                                   | 12           | 12         | 1.7                                                                         | 1.7          | 1.7        |
| 2008-09 | 10.9                                              | 13                                                   | 13           | 13         | 2.1                                                                         | 2.1          | 2.1        |
| 2009-10 | 11.4                                              | 14                                                   | 14           | 14         | 2.6                                                                         | 2.6          | 2.6        |
| 2010-11 | 12                                                | 15                                                   | 15           | 15         | 3.0                                                                         | 3.0          | 3.0        |
| 2011-12 | 11.6                                              | 15                                                   | 15.3         | 15.7       | 3.4                                                                         | 3.7          | 4.0        |
| 2012-13 | 11.3                                              | 15                                                   | 15.7         | 16.3       | 3.7                                                                         | 4.4          | 5.1        |
| 2013-14 | 10.9                                              | 15                                                   | 16           | 17         | 4.1                                                                         | 5.1          | 6.1        |
| 2014-15 | 10.5                                              | 15                                                   | 16.3         | 17.7       | 4.5                                                                         | 5.8          | 7.1        |
| 2015-16 | 10.2                                              | 15                                                   | 16.7         | 18.3       | 4.8                                                                         | 6.5          | 8.2        |
| 2016-17 | 9.8                                               | 15                                                   | 17           | 19         | 5.2                                                                         | 7.2          | 9.2        |
| 2017-18 | 7.3                                               | 15                                                   | 17.3         | 19.7       | 7.7                                                                         | 10.0         | 12.4       |
| 2018-19 | 4.8                                               | 15                                                   | 17.7         | 20.3       | 10.2                                                                        | 12.9         | 15.5       |
| 2019-20 | 3.8                                               | 15                                                   | 18           | 21         | 11.2                                                                        | 14.2         | 17.2       |
| 2020-21 | 2.9                                               | 15                                                   | 18.3         | 21.7       | 12.1                                                                        | 15.5         | 18.8       |
| 2021-22 | 1.9                                               | 15                                                   | 18.7         | 22.3       | 13.1                                                                        | 16.7         | 20.4       |
| 2022-23 | 1                                                 | 15                                                   | 19           | 23         | 14.0                                                                        | 18.0         | 22.0       |
| 2023-24 | 0                                                 | 15                                                   | 19.3         | 23.7       | 15.0                                                                        | 19.3         | 23.7       |
| 2024-25 | 0                                                 | 15                                                   | 19.7         | 24.3       | 15.0                                                                        | 19.7         | 24.3       |
| 2025-26 | 0                                                 | 15                                                   | 20           | 25         | 15.0                                                                        | 20.0         | 25.0       |

**Table S2.** Financial viability of the PPR vaccination in Karnataka under vaccination plan –I (actual vaccination coverage (from 2003-04 to 2020-21) with vaccinating 100% risk population for three years (from 2021-22 to 2023-24) followed by 10% need based vaccination coverage for next two years (from 2024-25 to 2025-26)).

| Year    | PPR incidence under without vaccination (%) |            |          | PPR incidence under with vaccination (%) (D) | Difference in incidence (%) |                |              | Vaccine coverage (%) | Estimated avoided average loss undue different scenario corrected for vaccine effectiveness (USD in million) |        |        | Total vaccination cost (USD in million) | Financial viability measures |         |        |
|---------|---------------------------------------------|------------|----------|----------------------------------------------|-----------------------------|----------------|--------------|----------------------|--------------------------------------------------------------------------------------------------------------|--------|--------|-----------------------------------------|------------------------------|---------|--------|
|         | Low (A)                                     | Medium (B) | High (C) |                                              | Low (A – D)                 | Medium (B – D) | High (C – D) |                      | Low                                                                                                          | Medium | High   |                                         | Low                          | Medium  | High   |
|         |                                             |            |          |                                              |                             |                |              |                      |                                                                                                              |        |        |                                         |                              |         |        |
| 2003-04 | 8                                           | 8          | 8        | 8.00                                         | 0.00                        | 0.00           | 0.00         | 6                    | 0.00                                                                                                         | 0.00   | 0.00   | 0.25                                    |                              |         |        |
| 2004-05 | 9                                           | 9          | 9        | 8.57                                         | 0.43                        | 0.43           | 0.43         | 14                   | 1.25                                                                                                         | 1.25   | 1.25   | 0.47                                    |                              |         |        |
| 2005-06 | 10                                          | 10         | 10       | 9.14                                         | 0.86                        | 0.86           | 0.86         | 29                   | 2.78                                                                                                         | 2.78   | 2.78   | 1.13                                    |                              |         |        |
| 2006-07 | 11                                          | 11         | 11       | 9.71                                         | 1.29                        | 1.29           | 1.29         | 32                   | 4.62                                                                                                         | 4.62   | 4.62   | 1.35                                    |                              |         |        |
| 2007-08 | 12                                          | 12         | 12       | 10.29                                        | 1.71                        | 1.71           | 1.71         | 42                   | 6.84                                                                                                         | 6.84   | 6.84   | 1.73                                    |                              |         |        |
| 2008-09 | 13                                          | 13         | 13       | 10.86                                        | 2.14                        | 2.14           | 2.14         | 42                   | 8.65                                                                                                         | 8.65   | 8.65   | 1.74                                    |                              |         |        |
| 2009-10 | 14                                          | 14         | 14       | 11.43                                        | 2.57                        | 2.57           | 2.57         | 51                   | 10.52                                                                                                        | 10.52  | 10.52  | 2.13                                    |                              |         |        |
| 2010-11 | 15                                          | 15         | 15       | 12.00                                        | 3.00                        | 3.00           | 3.00         | 52                   | 12.43                                                                                                        | 12.43  | 12.43  | 2.16                                    |                              |         |        |
| 2011-12 | 15                                          | 15.33      | 15.67    | 11.63                                        | 3.37                        | 3.70           | 4.03         | 91                   | 14.12                                                                                                        | 15.52  | 16.92  | 3.51                                    |                              |         |        |
| 2012-13 | 15                                          | 15.67      | 16.33    | 11.27                                        | 3.73                        | 4.40           | 5.07         | 70                   | 15.86                                                                                                        | 18.70  | 21.53  | 0.74                                    |                              |         |        |
| 2013-14 | 15                                          | 16         | 17       | 10.90                                        | 4.10                        | 5.10           | 6.10         | 100                  | 18.43                                                                                                        | 22.92  | 27.42  | 4.88                                    |                              |         |        |
| 2014-15 | 15                                          | 16.33      | 17.67    | 10.53                                        | 4.47                        | 5.80           | 7.13         | 123                  | 21.24                                                                                                        | 27.58  | 33.92  | 1.41                                    |                              |         |        |
| 2015-16 | 15                                          | 16.67      | 18.33    | 10.17                                        | 4.83                        | 6.50           | 8.17         | 110                  | 24.31                                                                                                        | 32.69  | 41.07  | 2.54                                    |                              |         |        |
| 2016-17 | 15                                          | 17         | 19       | 9.80                                         | 5.20                        | 7.20           | 9.20         | 128                  | 27.67                                                                                                        | 38.31  | 48.95  | 2.96                                    |                              |         |        |
| 2017-18 | 15                                          | 17.33      | 19.67    | 7.30                                         | 7.70                        | 10.03          | 12.37        | 87                   | 43.34                                                                                                        | 56.47  | 69.60  | 3.31                                    |                              |         |        |
| 2018-19 | 15                                          | 17.67      | 20.33    | 4.80                                         | 10.20                       | 12.87          | 15.53        | 120                  | 60.72                                                                                                        | 76.60  | 92.48  | 4.58                                    |                              |         |        |
| 2019-20 | 15                                          | 18         | 21       | 3.84                                         | 11.16                       | 14.16          | 17.16        | 100                  | 70.22                                                                                                        | 89.09  | 107.97 | 2.31                                    |                              |         |        |
| 2020-21 | 15                                          | 18.33      | 21.67    | 2.88                                         | 12.12                       | 15.45          | 18.79        | 100                  | 80.34                                                                                                        | 102.43 | 124.53 | 2.44                                    |                              |         |        |
| 2021-22 | 15                                          | 18.67      | 22.33    | 1.92                                         | 13.08                       | 16.75          | 20.41        | 100                  | 91.34                                                                                                        | 116.94 | 142.54 | 4.28                                    |                              |         |        |
| 2022-23 | 15                                          | 19         | 23       | 0.96                                         | 14.04                       | 18.04          | 22.04        | 100                  | 103.28                                                                                                       | 132.71 | 162.13 | 4.38                                    |                              |         |        |
| 2023-24 | 15                                          | 19.33      | 23.67    | 0.00                                         | 15.00                       | 19.33          | 23.67        | 100                  | 116.24                                                                                                       | 149.83 | 183.41 | 4.48                                    |                              |         |        |
| 2024-25 | 15                                          | 19.67      | 24.33    | 0.00                                         | 15.00                       | 19.67          | 24.33        | 10                   | 122.46                                                                                                       | 160.56 | 198.66 | 0.46                                    |                              |         |        |
| 2025-26 | 15                                          | 20         | 25       | 0.00                                         | 15.00                       | 20.00          | 25.00        | 10                   | 129.01                                                                                                       | 172.01 | 215.01 | 0.47                                    |                              |         |        |
|         |                                             |            |          |                                              |                             |                |              |                      |                                                                                                              |        |        | BCR                                     | 18.36                        | 23.45   | 28.55  |
|         |                                             |            |          |                                              |                             |                |              |                      |                                                                                                              |        |        | NPV (in USD million)                    | 931.97                       | 1205.75 | 1479.5 |
|         |                                             |            |          |                                              |                             |                |              |                      |                                                                                                              |        |        | IRR (%)                                 | 412                          | 412     | 412    |

**Table S3.** Financial viability of the PPR vaccination in Karnataka under vaccination plan –II (actual vaccination coverage (from 2003-04 to 2020-21) with vaccinating 100% naive population during the year 2021-22 followed by 30% bi-annual coverage during two subsequent years (from 2022-23 to 2023-24) and 10% need based vaccination coverage for next two years (from 2024-25 to 2025-26) as per the PPR-CP plan).

| Year    | PPR incidence under without vaccination (%) |            |          | PPR inci-<br>dence under<br>with vaccina-<br>tion (%)<br>(D) | Difference in incidence (%) |                   |                 | Vaccine<br>coverage<br>(%) | Estimated avoided average<br>loss undue different scenario   |        |        | Total vac-<br>cination cost<br>(USD in<br>million) | Financial viability measures |         |        |
|---------|---------------------------------------------|------------|----------|--------------------------------------------------------------|-----------------------------|-------------------|-----------------|----------------------------|--------------------------------------------------------------|--------|--------|----------------------------------------------------|------------------------------|---------|--------|
|         |                                             |            |          |                                                              |                             |                   |                 |                            | corrected for vaccine effec-<br>tiveness<br>(USD in million) |        |        |                                                    |                              |         |        |
|         | Low (A)                                     | Medium (B) | High (C) |                                                              | Low<br>(A – D)              | Medium<br>(B – D) | High<br>(C – D) |                            | Low                                                          | Medium | High   |                                                    | Low                          | Medium  | High   |
| 2003-04 | 8                                           | 8          | 8        | 8.00                                                         | 0.00                        | 0.00              | 0.00            | 6                          | 0.00                                                         | 0.00   | 0.00   | 0.25                                               |                              |         |        |
| 2004-05 | 9                                           | 9          | 9        | 8.57                                                         | 0.43                        | 0.43              | 0.43            | 14                         | 1.25                                                         | 1.25   | 1.25   | 0.47                                               |                              |         |        |
| 2005-06 | 10                                          | 10         | 10       | 9.14                                                         | 0.86                        | 0.86              | 0.86            | 29                         | 2.78                                                         | 2.78   | 2.78   | 1.13                                               |                              |         |        |
| 2006-07 | 11                                          | 11         | 11       | 9.71                                                         | 1.29                        | 1.29              | 1.29            | 32                         | 4.62                                                         | 4.62   | 4.62   | 1.35                                               |                              |         |        |
| 2007-08 | 12                                          | 12         | 12       | 10.29                                                        | 1.71                        | 1.71              | 1.71            | 42                         | 6.84                                                         | 6.84   | 6.84   | 1.73                                               |                              |         |        |
| 2008-09 | 13                                          | 13         | 13       | 10.86                                                        | 2.14                        | 2.14              | 2.14            | 42                         | 8.65                                                         | 8.65   | 8.65   | 1.74                                               |                              |         |        |
| 2009-10 | 14                                          | 14         | 14       | 11.43                                                        | 2.57                        | 2.57              | 2.57            | 51                         | 10.52                                                        | 10.52  | 10.52  | 2.13                                               |                              |         |        |
| 2010-11 | 15                                          | 15         | 15       | 12.00                                                        | 3.00                        | 3.00              | 3.00            | 52                         | 12.43                                                        | 12.43  | 12.43  | 2.16                                               |                              |         |        |
| 2011-12 | 15                                          | 15.33      | 15.67    | 11.63                                                        | 3.37                        | 3.70              | 4.03            | 91                         | 14.12                                                        | 15.52  | 16.92  | 3.51                                               |                              |         |        |
| 2012-13 | 15                                          | 15.67      | 16.33    | 11.27                                                        | 3.73                        | 4.40              | 5.07            | 70                         | 15.86                                                        | 18.70  | 21.53  | 0.74                                               |                              |         |        |
| 2013-14 | 15                                          | 16         | 17       | 10.90                                                        | 4.10                        | 5.10              | 6.10            | 100                        | 18.43                                                        | 22.92  | 27.42  | 4.88                                               |                              |         |        |
| 2014-15 | 15                                          | 16.33      | 17.67    | 10.53                                                        | 4.47                        | 5.80              | 7.13            | 123                        | 21.24                                                        | 27.58  | 33.92  | 1.41                                               |                              |         |        |
| 2015-16 | 15                                          | 16.67      | 18.33    | 10.17                                                        | 4.83                        | 6.50              | 8.17            | 110                        | 24.31                                                        | 32.69  | 41.07  | 2.54                                               |                              |         |        |
| 2016-17 | 15                                          | 17         | 19       | 9.80                                                         | 5.20                        | 7.20              | 9.20            | 128                        | 27.67                                                        | 38.31  | 48.95  | 2.96                                               |                              |         |        |
| 2017-18 | 15                                          | 17.33      | 19.67    | 7.30                                                         | 7.70                        | 10.03             | 12.37           | 87                         | 43.34                                                        | 56.47  | 69.60  | 3.31                                               |                              |         |        |
| 2018-19 | 15                                          | 17.67      | 20.33    | 4.80                                                         | 10.20                       | 12.87             | 15.53           | 120                        | 60.72                                                        | 76.60  | 92.48  | 4.58                                               |                              |         |        |
| 2019-20 | 15                                          | 18         | 21       | 3.84                                                         | 11.16                       | 14.16             | 17.16           | 100                        | 70.22                                                        | 89.09  | 107.97 | 2.31                                               |                              |         |        |
| 2020-21 | 15                                          | 18.33      | 21.67    | 2.88                                                         | 12.12                       | 15.45             | 18.79           | 100                        | 80.34                                                        | 102.43 | 124.53 | 2.44                                               |                              |         |        |
| 2021-22 | 15                                          | 18.67      | 22.33    | 1.92                                                         | 13.08                       | 16.75             | 20.41           | 100                        | 91.34                                                        | 116.94 | 142.54 | 4.28                                               |                              |         |        |
| 2022-23 | 15                                          | 19         | 23       | 0.96                                                         | 14.04                       | 18.04             | 22.04           | 60                         | 103.28                                                       | 132.71 | 162.13 | 2.63                                               |                              |         |        |
| 2023-24 | 15                                          | 19.33      | 23.67    | 0.00                                                         | 15.00                       | 19.33             | 23.67           | 60                         | 116.24                                                       | 149.83 | 183.41 | 2.69                                               |                              |         |        |
| 2024-25 | 15                                          | 19.67      | 24.33    | 0.00                                                         | 15.00                       | 19.67             | 24.33           | 10                         | 122.46                                                       | 160.56 | 198.66 | 0.46                                               |                              |         |        |
| 2025-26 | 15                                          | 20         | 25       | 0.00                                                         | 15.00                       | 20.00             | 25.00           | 10                         | 129.01                                                       | 172.01 | 215.01 | 0.47                                               |                              |         |        |
|         |                                             |            |          |                                                              |                             |                   |                 |                            |                                                              |        |        | BCR                                                | 19.65                        | 25.11   | 30.57  |
|         |                                             |            |          |                                                              |                             |                   |                 |                            |                                                              |        |        | NPV (in USD million)                               | 935.51                       | 1209.29 | 1483.1 |
|         |                                             |            |          |                                                              |                             |                   |                 |                            |                                                              |        |        | IRR (%)                                            | 412                          | 412     | 412    |
